# Supplementary material for: Combining a microphysiological system of three organ equivalents and transcriptomics to assess toxicological endpoints for cosmetic ingredients
Source: Royal Society of Chemistry journal article supplement (doi:10.1039/d3lc00546a), 2023-01-01
Supplement: d3lc00546a1.pdf [file d3lc00546a1.pdf]

## Supplementary Material

### Combining a microphysiological system of three organ equivalents and transcriptomics to assess toxicological endpoints for cosmetics ingredients

Nathalia de Carvalho Indolfo<sup>a,b</sup>, Melissa Dibbern Ganzerla<sup>c,d</sup>, Tábata Renée Doratioto<sup>a</sup>, Thayná Mendonça Avelino<sup>d</sup>, Larissa Bueno Tofani<sup>d</sup>, Luis Antonio Peroni<sup>d</sup>, Renata Santos Rabelo<sup>e</sup>, Kelen Fabiola Arroiteia<sup>a</sup> and Ana Carolina Migliorini Figueira<sup>d\*</sup>

**Supplementary Figure 1.** Acetaminophen and formaldehyde dose selection. **A)** Cell viability of HaCaT and fibroblasts after treatment with different doses of acetaminophen. **B)** Cell viability of HaCaT and fibroblasts after treatment with different doses of formaldehyde. **C)** Normalized relative expression of systemic toxicity marker genes in liver spheroids after treatment with 3.75 mM acetaminophen. **D)** Normalized relative expression of carcinogenicity marker genes in liver spheroids after treatment with 60  $\mu$ M formaldehyde. **E)** Liver equivalents viability after treatment with 3.75 mM acetaminophen and 60  $\mu$ M formaldehyde assessed using MTT assay.

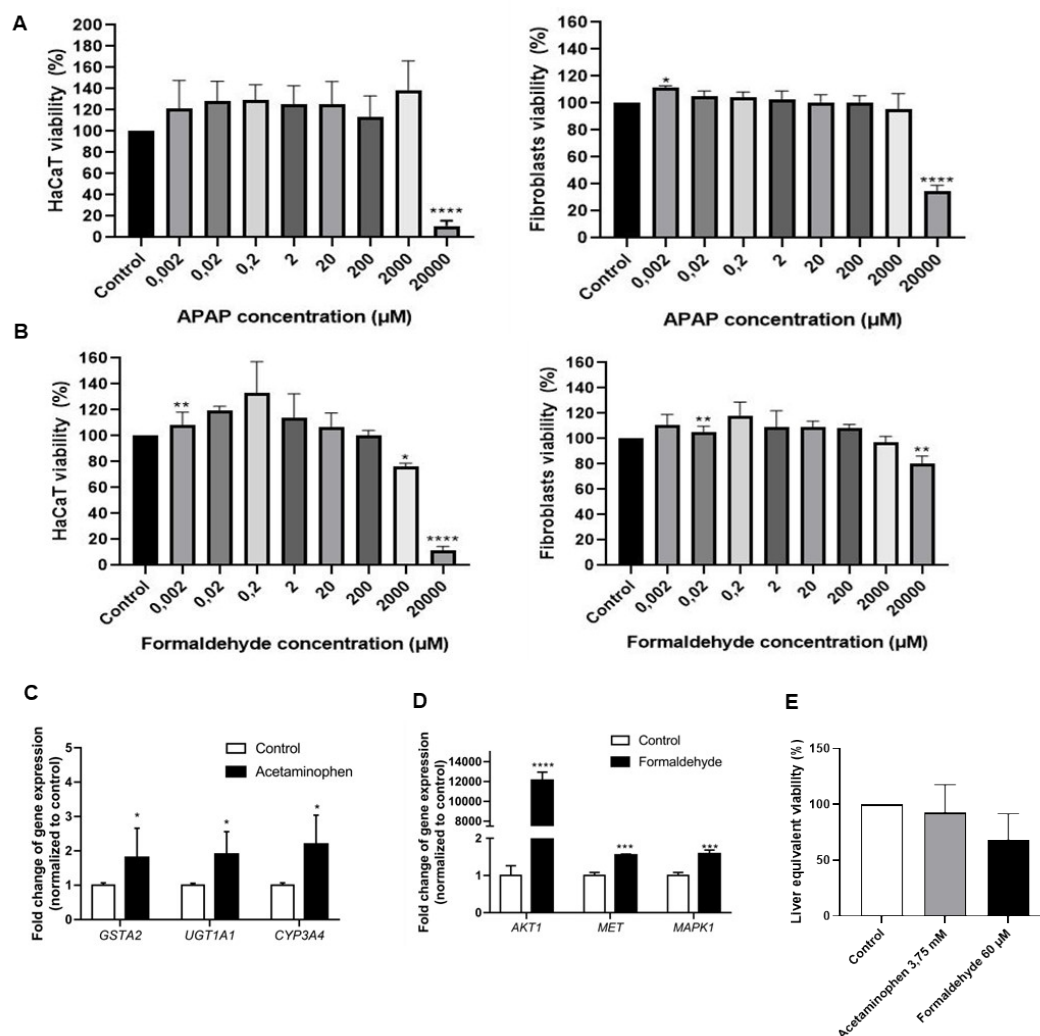

**Supplementary Table 1.** List of the main genes evaluated in our genic panels. **A)** List of genes for systemic toxicity panel. **B).** List of genes for carcinogenicity panel.

**A**

| <b>Systemic toxicity gene signature</b> |                                                |
|-----------------------------------------|------------------------------------------------|
| <b>Gene</b>                             | <b>Name</b>                                    |
| AFP                                     | Alpha-fetoprotein                              |
| ALB                                     | Albumin                                        |
| ALPI                                    | Alkaline phosphatase, intestinal               |
| ALPL                                    | Alkaline phosphatase                           |
| APOE                                    | Apolipoprotein E                               |
| CCL5                                    | C-C Motif Chemokine Ligand 5                   |
| CFD                                     | Complement factor D                            |
| CLDN1                                   | Claudin 1                                      |
| CXCL16                                  | C-X-C motif chemokine ligand 16                |
| CXCL8                                   | Interleukin-8                                  |
| CYP2E1                                  | Cytochrome P450 family 2 subfamily E member 1  |
| CYP3A4                                  | Cytochrome P450 family 3 subfamily A member 4  |
| FABP1                                   | Liver fatty acid binding protein 1             |
| GPT                                     | Glutamic-pyruvic transaminase                  |
| GSTA1                                   | Glutathione S-transferase alpha 1              |
| LCN2                                    | Lipocalin 2                                    |
| MIR215                                  | MicroRNA 215                                   |
| MLXIPL                                  | MLX Interacting Protein Like                   |
| NR1H3                                   | Nuclear receptor subfamily 1 group H member 3  |
| NR1H4                                   | Nuclear receptor subfamily 1 group H member 4  |
| NT5E                                    | 5'-nucleotidase ecto                           |
| SI                                      | Sucrase-isomaltase                             |
| SLC22A1                                 | Solute carrier family 22 member 1              |
| SPP1                                    | Secreted phosphoprotein 1                      |
| SREBF1                                  | Sterol response element binding protein 1c     |
| SULT2A1                                 | Sulfotransferase Family 2A Member 1            |
| TJP1                                    | Tight Junction Protein 1                       |
| TJP3                                    | Tight junction protein 3                       |
| TNF                                     | Tumor necrosis factor                          |
| UGT2B4                                  | UDP glucuronosyltransferase family 2 member B4 |

**B**

| <b>Carcinogenicity gene signature</b> |                                                       |
|---------------------------------------|-------------------------------------------------------|
| <b>Gene</b>                           | <b>Name</b>                                           |
| AKT1                                  | AKT Serine/Threonine Kinase 1                         |
| AKT2                                  | AKT Serine/Threonine Kinase 2                         |
| BCL2                                  | BCL2 Apoptosis Regulator                              |
| CCND1                                 | Cyclin D1                                             |
| CCNE1                                 | Cyclin E1                                             |
| ERBB2                                 | Erb-b2 receptor tyrosine kinase 2                     |
| FOS                                   | Fos proto-oncogene, AP-1 transcription factor subunit |
| HIF1A                                 | Hypoxia Inducible Factor 1 Subunit Alpha              |
| IL6                                   | Interleukin 6                                         |
| JAG1                                  | Jagged canonical Notch ligand 1                       |
| JAK2                                  | Janus kinase 2                                        |
| JUN                                   | Jun Proto-Oncogene, AP-1 Transcription Factor Subunit |
| KIT                                   | KIT Proto-Oncogene, Receptor Tyrosine Kinase          |
| MDM2                                  | MDM2 Proto-Oncogene                                   |
| MTOR                                  | Mechanistic target of rapamycin kinase                |
| RICTOR                                | RPTOR Independent Companion Of MTOR Complex 2         |
| RPTOR                                 | Regulatory Associated Protein Of MTOR Complex 1       |
| STAT5A                                | Signal transducers and activators of transcription 5A |
| TWIST1                                | Twist family bHLH transcription factor 1              |
| VEGFA                                 | Vascular endothelial growth factor-A                  |
| YAP1                                  | Yes associated protein 1                              |

**Supplementary Figure 2.** Modulation of inflammatory genes after treatment in the MPS. **A)** Expression of CCL5, CD44, CXCL8, IL6, LCN2 and TNF $\alpha$  in skin, liver, and intestinal barrier equivalents after treatment with acetaminophen. **B)** Expression of CD44, IL6 and NFKB1 in skin, liver, and intestinal barrier equivalents after formaldehyde treatment.

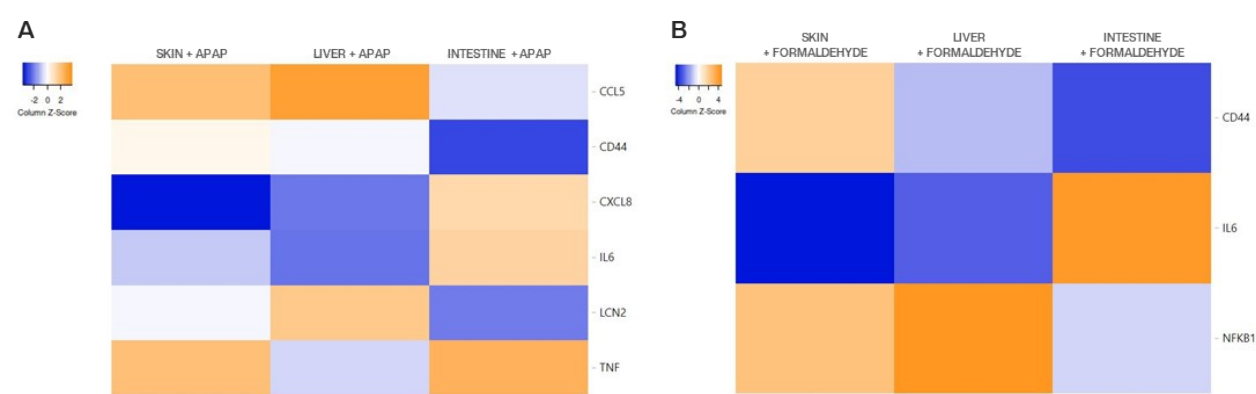

**Supplementary Table 2.** IPA analysis show the main biological processes modulated by gene expression evaluation. At left, the top canonical pathways, diseases and toxicological functions found after acetaminophen treatment (A). At right, the top canonical pathways, diseases, biological functions and toxicological functions found after formaldehyde treatment (B).

Considering intestinal barrier, the gastrointestinal disease was the main disorder in which the genes modulated in our panel were involved, while considering the liver spheroids, the main disorder was hepatic system disease. These findings indicate that the proposed model effectively assesses the potential for systemic toxicity, as topical treatment on the skin equivalent impacted the other organ equivalents within the MPS.

| A                                             |  | B                                           |  |
|-----------------------------------------------|--|---------------------------------------------|--|
| Systemic toxicity top canonical pathways      |  | Carcinogenicity top canonical pathways      |  |
| Xenobiotic Metabolism Signaling               |  | Molecular mechanisms of cancer              |  |
| PXR/RXR activation                            |  | Carcinogenicity top diseases and disorders  |  |
| FXR/RXR activation                            |  | Cancer                                      |  |
| Hepatic cholestasis                           |  | Dermatological diseases and conditions      |  |
| Systemic toxicity top diseases and disorders  |  | Gastrointestinal disease                    |  |
| Gastrointestinal disease                      |  | Hepatic system disease                      |  |
| Hepatic system disease                        |  | Carcinogenicity top biological functions    |  |
| Organismal injury and abnormalities           |  | Cell death and survival                     |  |
| Inflammatory disease                          |  | Cellular growth and proliferation           |  |
| Systemic toxicity top toxicological functions |  | Cellular movement                           |  |
| Liver cholestasis                             |  | Cell cycle                                  |  |
| Liver inflammation                            |  | Carcinogenicity top toxicological functions |  |
| Liver cirrhosis                               |  | Necrosis/cell death                         |  |
| Liver steatosis                               |  | Hepatocellular carcinoma                    |  |
|                                               |  | Liver hyperplasia/hyperproliferation        |  |
|                                               |  | Liver inflammation/hepatitis                |  |
